# Supplementary material for: Palliative long-term abdominal drains versus repeated drainage in individuals with untreatable ascites due to advanced cirrhosis: study protocol for a feasibility randomised controlled trial
Source: PubMed Central journal article supplement (PMC6062920; doi:10.1186/s13063-018-2779-0), 2018-07-27
Supplement: 13063_2018_2779_MOESM2_ESM.pdf [file 13063_2018_2779_MOESM2_ESM.pdf]

## Monitoring Plan

|                                                                                                                                                                                                                                                                                                                                                                                                                                                                                                                                                                                                                                                                                                                                                                                                                                                                                                                                                                                                                                                          |                            |
|----------------------------------------------------------------------------------------------------------------------------------------------------------------------------------------------------------------------------------------------------------------------------------------------------------------------------------------------------------------------------------------------------------------------------------------------------------------------------------------------------------------------------------------------------------------------------------------------------------------------------------------------------------------------------------------------------------------------------------------------------------------------------------------------------------------------------------------------------------------------------------------------------------------------------------------------------------------------------------------------------------------------------------------------------------|----------------------------|
| <b>Study Title:</b> REDUCE: Palliative Long-term Abdominal Drains versus Repeated Drainage for Ascites due to Cirrhosis                                                                                                                                                                                                                                                                                                                                                                                                                                                                                                                                                                                                                                                                                                                                                                                                                                                                                                                                  |                            |
| <b>Sponsor Reference:</b> 173423                                                                                                                                                                                                                                                                                                                                                                                                                                                                                                                                                                                                                                                                                                                                                                                                                                                                                                                                                                                                                         | <b>EUDRACT Number:</b> n/a |
| <b>REC reference:</b> 15/SC/0257                                                                                                                                                                                                                                                                                                                                                                                                                                                                                                                                                                                                                                                                                                                                                                                                                                                                                                                                                                                                                         |                            |
| <b>Chief Investigator:</b> Dr Sumita Verma                                                                                                                                                                                                                                                                                                                                                                                                                                                                                                                                                                                                                                                                                                                                                                                                                                                                                                                                                                                                               |                            |
| <b>Sponsor:</b> Brighton and Sussex University Hospital NHS Trust                                                                                                                                                                                                                                                                                                                                                                                                                                                                                                                                                                                                                                                                                                                                                                                                                                                                                                                                                                                        |                            |
| <p><b>Primary Objective (P)</b><br/>                 Acceptability of LTAD to patients/carers/ staff and whether the preliminary cost-effectiveness analysis indicates that LTAD is potentially cost-effective without affecting the patient/ carer experience, or if LTAD is more costly than LVP but preferred by service users.<br/>                 Specifically whether:</p> <ul style="list-style-type: none"> <li>a. Percentage of study period time in hospital for LTAD group is &lt; 50% of that for the LVP group (where the study period time is the number of days from randomisation to the end of the study period or the patient's death (whichever is earliest); time spent in hospital is the number of bed days used)</li> <li>b. Attrition rate is not &gt; 50%</li> <li>c. There is &lt;10% overall rate of LTAD removal due to one or more of the following complications: peritonitis, failed insertion, bleeding and blockage</li> <li>d. 80% of questionnaires and qualitative interviews completed by each patient.</li> </ul> |                            |
| <b>Secondary Objectives (S):</b><br>n/a                                                                                                                                                                                                                                                                                                                                                                                                                                                                                                                                                                                                                                                                                                                                                                                                                                                                                                                                                                                                                  |                            |

|                                                                                             |
|---------------------------------------------------------------------------------------------|
| <b>SUMMARY OF MONITORING ARRANGMENTS</b>                                                    |
| CTUSOP003 'Monitoring' will be followed by the trial monitor.<br><b>Type of Monitoring:</b> |

Central monitoring will be carried out.

**Site Initiation Visit:**

The SIV should involve a face to face or online meeting with the CI, Research Fellow, Trial Manager, monitor, research team and any other relevant supporting services. Relevant research staff from the research site that should be present include the PI, co-Investigators, research nurses, research lab staff and community nurses.

Attendance at this training should be documented on the Site Initiation Training Log. Any further study training provided to research staff after this session must be documented on a Training Log.

A Site Initiation Report will be produced by the Trial Manager and sent to the CI and all of the relevant research staff within 10 working days of the SIV. This will detail any outstanding issues and assign responsibilities for follow up before the site can be activated.

When the site is ready to begin recruitment, the site will be sent a 'Site Activation' notification by the Trial Manager.

Minimum documents required by the coordinating centre prior to 'Site Activation' notification are as follows:

- Copy of completed delegation log
- Copy of completed SIV training log and any other training logs/evidence of training for those who were unable to attend the SIV
- Copies of CVs, GCP certificates and honorary contracts (if applicable) for all those on the delegation log
- Locally headed PIS, ICF and GP letter and any additional documents
- Copy of local R&D confirmation of capability and capacity
- Copy of local contract
- Copy of the Monitoring Plan signed by PI
- Details of archiving arrangements at local site
- eCRF training for data entry staff

**Central Monitoring:**

- Central verification checks on the eCRF will be performed throughout the study by the Trial Manager or delegate, in accordance with the Data Management Plan.

**Site specific monitoring**

| Item                                | Relevant document                            | Checks to complete                                                                         | Frequency      |
|-------------------------------------|----------------------------------------------|--------------------------------------------------------------------------------------------|----------------|
| ISF completeness                    | ISF checklist                                | Check that no documents listed are missing                                                 | every 6 months |
| Staff training and responsibilities | Delegation log                               | Confirm that randomisation is being carried out by delegated person                        | every 6 months |
| Training records                    | CV                                           | All staff signed off by PI and trained                                                     | every 6 months |
|                                     | GCP                                          | Protocol training, GCP, CV are up to date                                                  | every 6 months |
|                                     | Protocol training log                        |                                                                                            | every 6 months |
| Samples storage                     | Sample storage records                       | Send copy of sample storage spreadsheet                                                    | every 6 months |
| Screening/enrolment of participants | Screening and enrolment log for participants | Confirm all participants are listed, log fully complete, review refusal or ineligibility   | every 6 months |
| Enrolment log of carers             | Screening and enrolment log for carers       | Confirm log fully complete                                                                 | every 6 months |
|                                     |                                              | Cross check that questionnaires completed for all carers enrolled on MACRO                 | every 6 months |
| Worksheets                          |                                              | Cross check that any changes to the protocol have been reflected in worksheets if required | every 6 months |

| Participant specific monitoring |                                                                                           |                                                                                                                                                                                                                                                                                                                    |                                                     |
|---------------------------------|-------------------------------------------------------------------------------------------|--------------------------------------------------------------------------------------------------------------------------------------------------------------------------------------------------------------------------------------------------------------------------------------------------------------------|-----------------------------------------------------|
| Item                            | Relevant document                                                                         | Checks to complete                                                                                                                                                                                                                                                                                                 | Frequency                                           |
| Eligibility checks              | Eligibility form<br>Liver Disease History<br>H&B<br>Ascitic tap<br>Urine<br>Blood culture | Complete MACRO checks from Data Validation Plan<br>Child Pugh<br>Liver disease score form<br>H&B: Bilirubin q8a, Albumin q14a, INR q7,<br>Ascites<br>Encephalopathy<br>Infection: check H&B, Ascitic tap, urine, blood culture<br>Liver Disease History: reason not for transplant<br>Prior hepatic encephalopathy | Ongoing (Immediately after each randomised patient) |
| Randomisation                   | Randomisation list from MACRO                                                             | Cross check MACRO randomisation list with MACRO treatment                                                                                                                                                                                                                                                          | every 6 months                                      |
| Adverse event/conmed review     | MACRO checks from DVP                                                                     | Check that no SAEs missed from reporting.                                                                                                                                                                                                                                                                          | every 6 months                                      |
|                                 |                                                                                           | Cross check conmeds with AEs listed                                                                                                                                                                                                                                                                                | every 6 months                                      |

|                               |                                                                                                               |                                                                                        |                                                     |
|-------------------------------|---------------------------------------------------------------------------------------------------------------|----------------------------------------------------------------------------------------|-----------------------------------------------------|
|                               |                                                                                                               | Check that all AEs resolved/reviewed                                                   | every 6 months                                      |
| Deaths                        | Cross check MACRO with Data Patient Status log                                                                | Check deaths have been reported correctly - withdrawal form completed. Withdrawal log  | every 6 months                                      |
| Drains and drainage bags logs | REDUCE Rocket Medical Drains and Bags Log- v1.0 - 11 Oct 2015                                                 | Check total number provided per patient versus total agreed to be provided per patient | every 6 months                                      |
| Data checks                   | Automated checks - review outstanding queries<br>Data Validation Plan - manual queries<br>Review missing data | Complete checks                                                                        | every 6 months - when a patient completes treatment |

| Qualitative study   |                                     |                                                                                                      |                |
|---------------------|-------------------------------------|------------------------------------------------------------------------------------------------------|----------------|
| Participant details | Qualitative screening/enrolment log | Check screening/ enrolment log fully completed                                                       | every 6 months |
| Consent             | Consent form                        | Check completed appropriately by Qualitative Researcher                                              | every 6 months |
|                     |                                     | Verbal consent recorded and stored in secure backed up area                                          | every 6 months |
|                     |                                     | Interview separately recorded and stored in secure backed up area (check start and end of recording) | every 6 months |

- Site Data Officers can perform missing data checks and the TM/DM will regularly follow up to ensure completeness of data entry.
- A DMC will meet approximately every six months to:
  - address any safety concerns
  - review any ethical issues raised
  - monitor adverse events
- A Central Monitoring Report will be completed.

#### On Site Monitoring Visits:

No onsite visits are planned, however, if issues are identified by the Trial Manager as a result of central monitoring, then onsite monitoring visits may be required.

#### Close Out Monitoring

All outstanding queries must be resolved or confirmed as unresolvable

The ISF must be complete and final ISF checklist returned to BSCTU by the site.

The completed protocol deviations list must be reviewed, signed and sent to the trial statistician.

An official close out letter will be sent by the trial manager to each participating site.

The TMF must be reviewed and confirmed as complete, prior to archiving.

This plan will be kept under review and modified as necessary throughout the duration of the trial.

Senior Trial Manager: On behalf of Sponsor

Print: \_\_\_\_\_

Sign: \_\_\_\_\_

Date: \_\_\_\_\_

Chief/Principal Investigator:

Site: PLYMOUTH HOSPITALS NHS TRUS

Print: DR DAVID SHERIDAN

Sign: 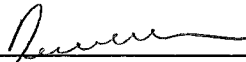

Date: 02 FEB 2017
